# Supplementary material
Source: Springer Nature journal article supplement (https://www.springerprofessional.de/resource/supplementary/13638_2014_945_MOESM2_ESM.pdf/11898816)

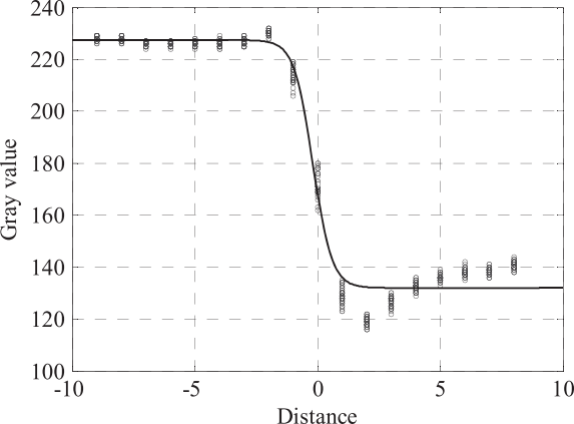

Supplement: MOESM2 [file 11898816]
